# Supplementary material for: Self-supporting network-structured MoS2/heteroatom-doped graphene as superior anode materials for sodium storage
Source: Royal Society of Chemistry journal article supplement (doi:10.1039/d2ra08207a), 2023-01-01
Supplement: d2ra08207a1.pdf [file d2ra08207a1.pdf]

## Electronic Supplementary Information

### Self-supporting network structured MoS<sub>2</sub>/heteroatom doped graphene as superior anode materials for sodium storage

Guanhua Yang <sup>a, b</sup>, Xu Wang <sup>a</sup>, Yihong Li <sup>a</sup>, Zhiguo Zhang <sup>a</sup>, Jiayu Huang <sup>a</sup>, Fenghua Zheng <sup>b</sup>, Qichang Pan <sup>b</sup>, Hongqiang Wang <sup>b\*</sup>, Qingyu Li <sup>b</sup>, Yezheng Cai <sup>b\*</sup>

<sup>a</sup> Guangxi Key Laboratory of Automobile Components and Vehicle Technology, School of Mechanical and Automotive Engineering, Guangxi University of Science and Technology, Liuzhou, 545006, China

<sup>b</sup> School of Chemistry and Pharmaceutical Sciences, Guangxi Normal University, Guilin, 541004, China

Corresponding authors

Email addresses:

\*Yezheng Cai, yezhengcai@163.com,

\*Hongqiang Wang, whq74@gxnu.edu.cn.

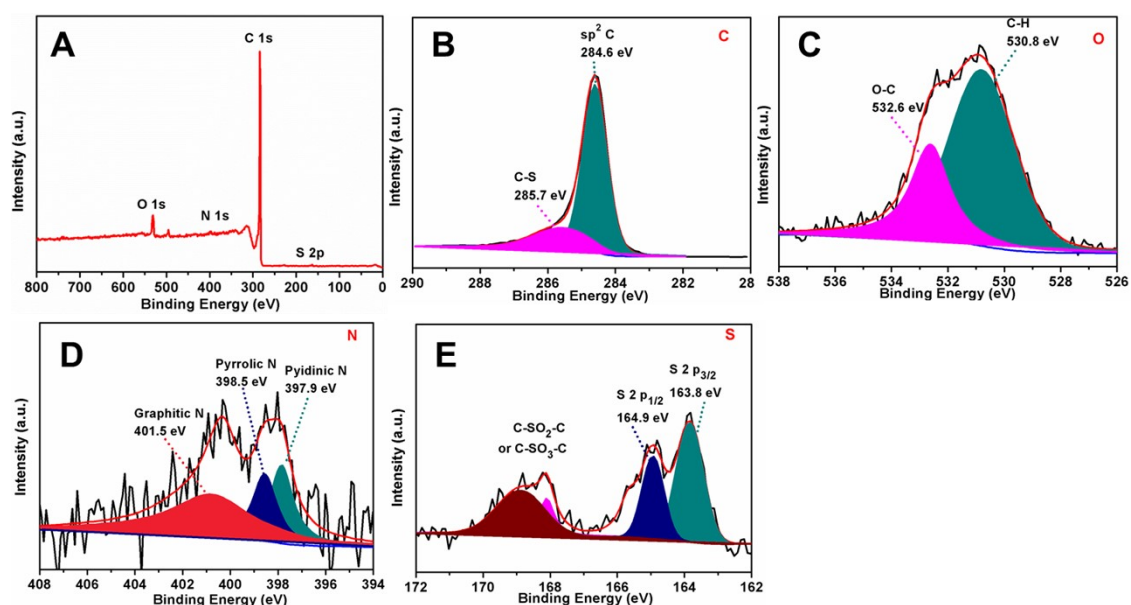

**Fig. S1** XPS spectra of the N, S co-doped graphene nanosheets (A) and the corresponding high-resolution of C 1s (B), O 1s (C), N 1s (D) and S 2p (E).

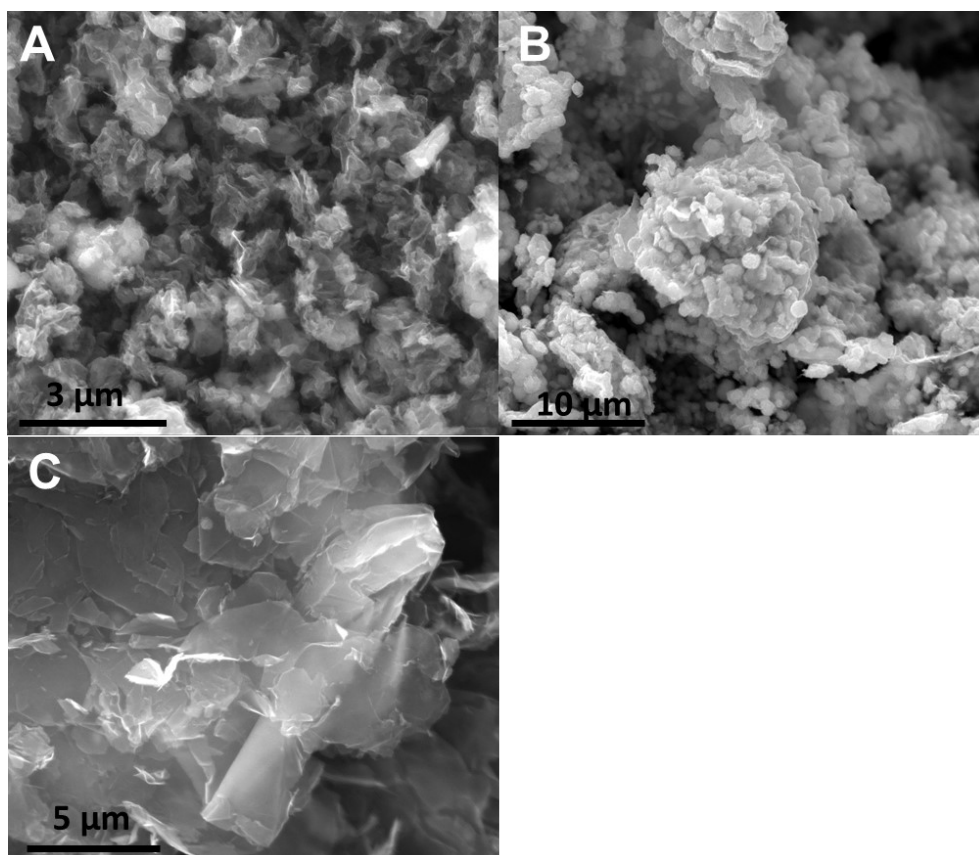

**Fig. S2** SEM images of MoS<sub>2</sub>/Gs-G (A), bulk MoS<sub>2</sub> (B) and bulk N, S co-doped graphene (C) samples.

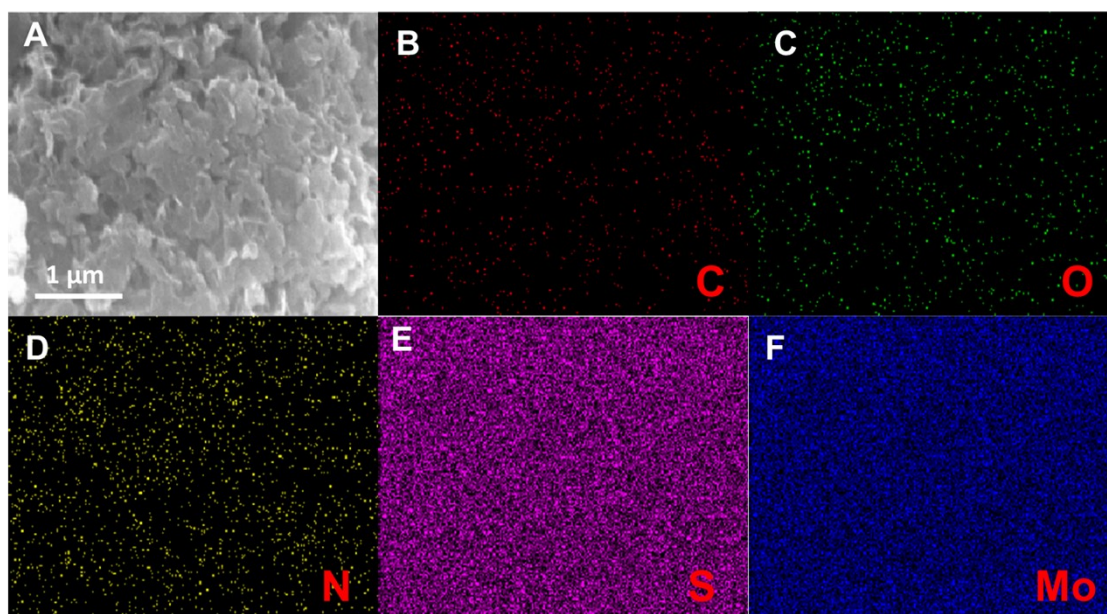

**Fig. S3** SEM image of MoS<sub>2</sub>/NSGs-G sample (A) and corresponding elemental mapping images of C (B), O (C), N (D), S (E) and Mo (F).

Table S1 The rate charge capacity of MoS<sub>2</sub>/NSGs-G, MoS<sub>2</sub>/Gs-G, bulk N, S co-doped graphene

and bulk1 MoS<sub>2</sub> at different current densities.

| Samples                       | Specific capacity (mAh g <sup>-1</sup> ) |                     |                      |                    |                    |                    |                     |                     |
|-------------------------------|------------------------------------------|---------------------|----------------------|--------------------|--------------------|--------------------|---------------------|---------------------|
|                               | 0.1A g <sup>-</sup>                      | 0.2A g <sup>-</sup> | 0.5 A g <sup>-</sup> | 1 A g <sup>-</sup> | 2 A g <sup>-</sup> | 5 A g <sup>-</sup> | 10 A g <sup>-</sup> | 0.1A g <sup>-</sup> |
|                               | 1                                        | 1                   | 1                    | 1                  | 1                  | 1                  | 1                   | 1                   |
| <b>MoS<sub>2</sub>/NSGs-G</b> | 496.6                                    | 493.5               | 453.9                | 418.1              | 383.8              | 333.1              | 294.4               | 507.3               |
| <b>MoS<sub>2</sub>/Gs-G</b>   | 453.2                                    | 436.8               | 402.6                | 366.0              | 325.4              | 270.9              | 234.6               | 445.8               |
| <b>Bulk graphene</b>          | 344.8                                    | 327.2               | 315.7                | 303.2              | 286.5              | 248.5              | 238.7               | 397.7               |
| <b>Bulk MoS<sub>2</sub></b>   | 262.8                                    | 272.1               | 270.0                | 258.9              | 243.3              | 215.3              | 211.2               | 289.8               |

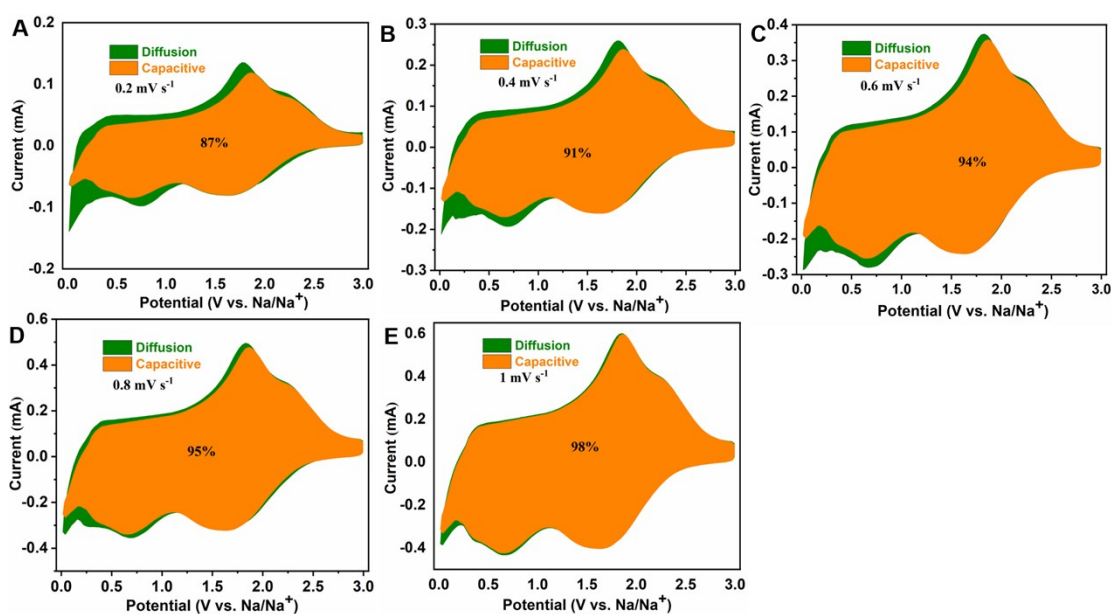

**Fig. S4** Capacitive charge storage contribution (orange) and diffusion charge storage contribution (olive) at 0.2 (A) mV s<sup>-1</sup>, 0.4 (B) mV s<sup>-1</sup>, 0.6 (C) mV s<sup>-1</sup>, 0.8 (D) mV s<sup>-1</sup> and 1 (E) mV s<sup>-1</sup>.
